# Supplementary material for: Quality assurance data for regional drip-and-ship strategies- gearing up the transfer process
Source: PubMed Central journal article supplement (PMC8327429; doi:10.1186/s42466-021-00136-x), 2021-08-02

Supplement  
Consort diagram

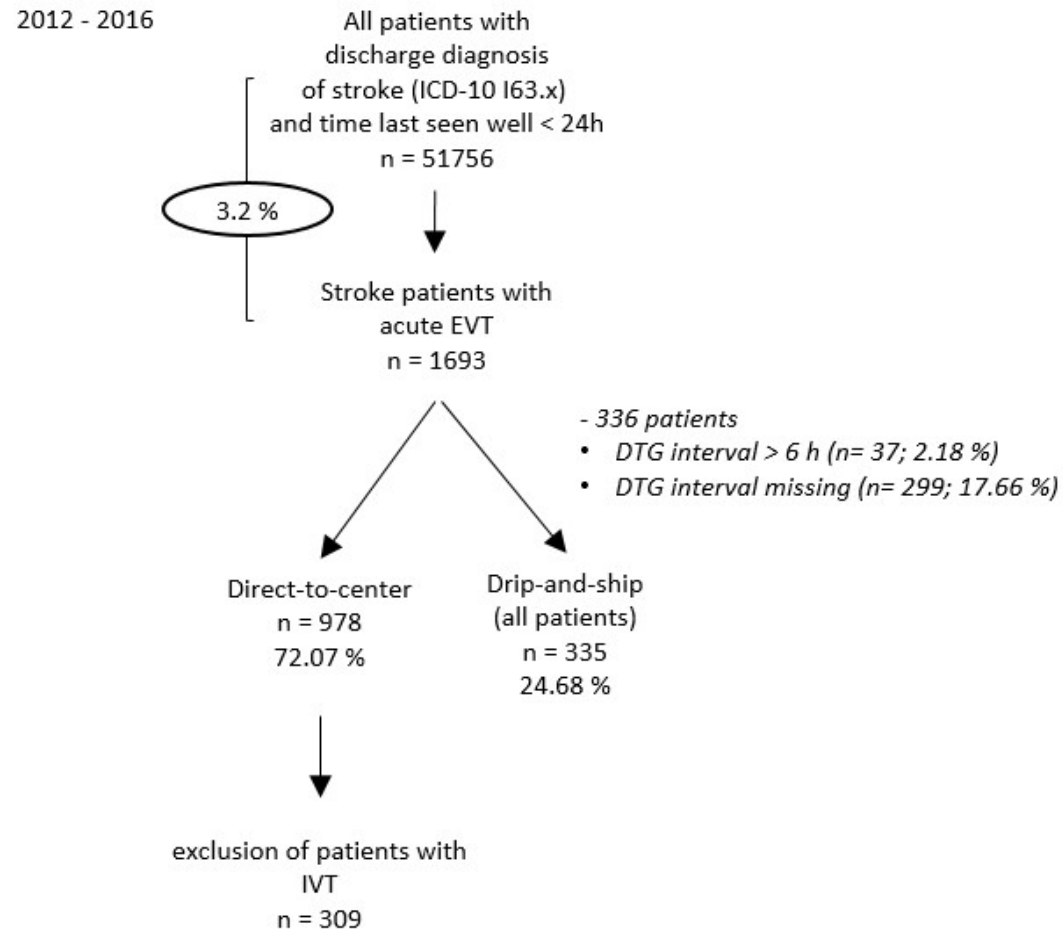

Supplement  
Consort diagram

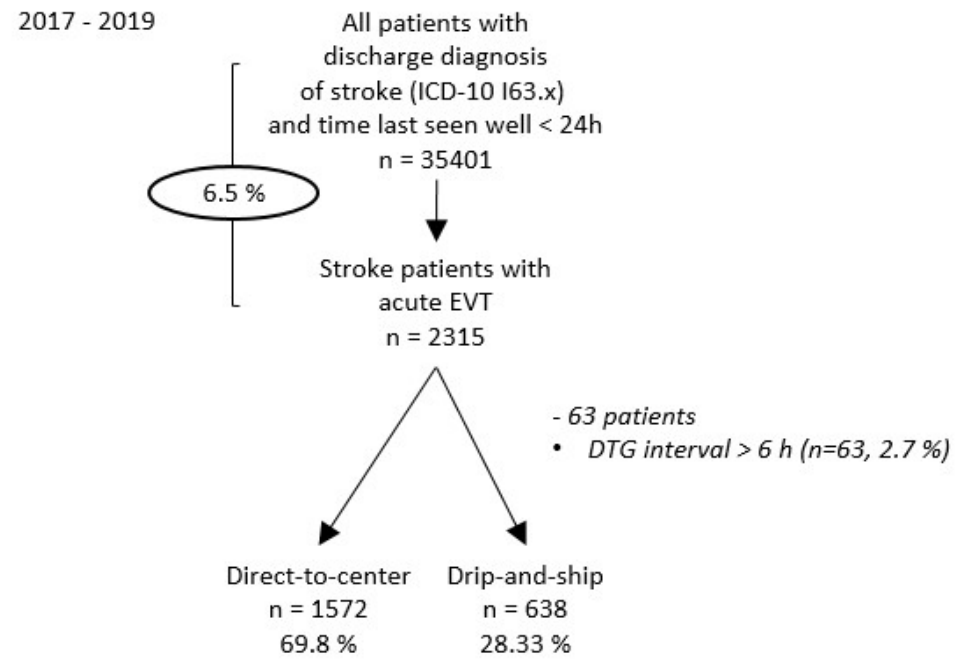

Supplement: 42466_2021_136_MOESM1_ESM.pdf [file 42466_2021_136_MOESM1_ESM.pdf]
